# Supplementary material for: Preparing Ti3C2-modified ZnFe2O4 photocatalytic materials and evaluating their performance in degrading tetracycline in water
Source: Royal Society of Chemistry journal article supplement (doi:10.1039/d3re00374d), 2023-09-28
Supplement: d3re00374d1.pdf [file d3re00374d1.pdf]

# Preparation of $\text{Ti}_3\text{C}_2$ -modified $\text{ZnFe}_2\text{O}_4$ photocatalytic materials and their performance in degrading tetracycline in water

## Section S1: Chemicals and reagents.

Titanium aluminum carbide powder ( $\text{Ti}_3\text{AlC}_2 > 98\%$ , 200 mesh, Foshan Ene Technology Co., LTD), hydrofluoric acid ( $\text{HF} \geq 40\%$ , Shanghai Maclin Biochemical Technology Co., Ltd.), dimethyl sulfoxide ( $\text{DMSO} \geq 99\%$ , Shanghai Maclin Biochemical Technology Co., Ltd.), Zinc acetate ( $\text{Zn}(\text{AC})_2 \cdot 2\text{H}_2\text{O} \geq 99.0\%$ , Tianjin Kemi Ou Chemical Co., Ltd.), Ferric chloride hexahydrate ( $\text{FeCl}_3 \cdot 6\text{H}_2\text{O}$ , Shanghai Wokai Biotechnology Co., Ltd.), sodium hydroxide ( $\text{NaOH} \geq 96.0\%$ , Chengdu Jinshan Chemical Co., Ltd.), Disodium ethylenediamine tetraacetate ( $\text{EDTA-2Na} \geq 99.0\%$ , Shanghai Sobao Biotechnology Co., Ltd.), p-benzoquinone ( $\text{C}_6\text{H}_4\text{O}_2$ , 99%, Shanghai Aladdin Reagent Co., Ltd.), ethylene glycol ( $(\text{CH}_2\text{OH})_2$ , 98%, Shanghai Aladdin Reagent Co., Ltd.), Isopropyl alcohol ( $(\text{CH}_3)_2\text{CHOH}$ , 99.7%, Tianjin Fuyu Fine Chemical Co., Ltd.), Tetracycline hydrochloride ( $\text{C}_{22}\text{H}_{24}\text{N}_2\text{O}_8 > 96\%$ , Shanghai Alding Reagent Co., Ltd.), deionized water, anhydrous ethanol. Reagents and chemicals are analytical grade and require no further purification for use.

## Section S2: Synthesis of $\text{Ti}_3\text{C}_2$ .

According to the literature report <sup>1</sup>, the preparation plan of  $\text{Ti}_3\text{C}_2$  is shown in the text. 2.5 g  $\text{Ti}_3\text{AlC}_2$  is taken, a small amount of  $\text{Ti}_3\text{AlC}_2$  is slowly added into 60 mL HF within 5 minutes for etching, and the Al layer is removed by stirring at room temperature ( $25^\circ\text{C}$ ) for 72 h, and then filtered through the sand core funnel device. The products were washed with deionized water and anhydrous ethanol successively until the PH of the washing liquid was about neutral. The filtered products were put into a vacuum drying oven at  $60^\circ\text{C}$  for 12 h. The dried black powder was added into 50 mL DMSO for intercalation, stirred at room temperature for 24 h, filtered through sand core funnel device, washed with deionized water and anhydrous ethanol, and dried overnight in a vacuum drying oven at  $60^\circ\text{C}$ . Finally, multilayer  $\text{Ti}_3\text{C}_2$  black powder was obtained.

## Section S3: Synthesis of $\text{ZnFe}_2\text{O}_4$ and $\text{Ti}_3\text{C}_2/\text{ZnFe}_2\text{O}_4$

Based on the literature <sup>2</sup>, a series of  $\text{Ti}_3\text{C}_2/\text{ZnFe}_2\text{O}_4$  photocatalytic materials and a single  $\text{ZnFe}_2\text{O}_4$  photocatalytic material were synthesized by hydrothermal method.  $\text{Ti}_3\text{C}_2/\text{ZnFe}_2\text{O}_4$  composites with a mass ratio of 1.5/1, 1/1, 0.5/1, 0.25/1 and 0.2/1 were prepared with  $\text{Ti}_3\text{C}_2$  of different qualities, that is, a certain amount of  $\text{Ti}_3\text{C}_2$  MXenes was added to 20 mLEG, and the

black  $\text{Ti}_3\text{C}_2$  was completely dispersed in EG after ultrasonic for 20 min. Then 0.1352 g  $\text{FeCl}_3 \cdot 6\text{H}_2\text{O}$  was added into the mixture, and the mixture was continued to be ultrasounded for 10 min to form A black brown homogeneous viscous solution A. The transparent thick solution B was obtained by dissolving 0.0549 g  $\text{Zn}(\text{AC})_2 \cdot 2\text{H}_2\text{O}$  in 10 mL EG for 10 min. Under the condition of intense stirring of solution A, solution B was added to solution A at the rate of 1 drop/s (while stirring). After the drip was added, the reaction was carried out at the same speed for 30 min, and the PH of the solution was adjusted slowly with 1 mol/L NaOH until the PH was 11, and then the solution was stirred vigorously for 1 h. Finally, the obtained solution was transferred to a 100 mL polytetrafluoroethylene high-pressure reactor and reacted at  $160^\circ\text{C}$  for 6 h. After removal, the product was cooled to room temperature, washed with deionized water and anhydrous ethanol for 3 times, and dried overnight in a vacuum drying oven at  $60^\circ\text{C}$ . Finally, the brown product  $\text{Ti}_3\text{C}_2/\text{ZnFe}_2\text{O}_4$  was obtained. (The preparation of  $\text{ZnFe}_2\text{O}_4$  is the same as the preparation of  $\text{Ti}_3\text{C}_2/\text{ZnFe}_2\text{O}_4$  in other steps and conditions except that no  $\text{Ti}_3\text{C}_2$  is added)

#### **Section S4: Photocatalytic activity evaluation**

The photocatalytic activities of  $\text{Ti}_3\text{C}_2$ ,  $\text{ZnFe}_2\text{O}_4$  and  $\text{Ti}_3\text{C}_2/\text{ZnFe}_2\text{O}_4$  series photocatalysts were evaluated for TCH degradation under simulated visible light irradiation were investigated. Typically, 20 mg of the as-prepared catalyst was added to a TCH solution (100 mL,  $20 \text{ mg} \cdot \text{L}^{-1}$ ). The solution was stirred continuously at 350 rpm in the dark for 30 min to reach adsorption-desorption equilibrium. After simulated sunlight illumination generated by a 300 W Xe lamp (Alpha-1860A, Shanghai Spectral Element Instrument Co., Ltd. output wavelength 420–780 nm), 3 mL of the suspension was removed and filtrated through a  $0.22 \mu\text{m}$  filter every 10 min and detected using a UV–vis spectrophotometer at  $\lambda = 356 \text{ nm}$ . All the degradation experiments were conducted at a constant room temperature ( $25^\circ\text{C}$ ). The catalyst was recovered via centrifugation with water and anhydrous ethanol for recycling.

#### **Section S5: Characterization.**

The crystal structures of all the samples were analysed by X-ray diffractometer (XRD, BRUKERD 8A DVANCE) at a scanning rate of  $5 \text{ min}^{-1}$  in the  $2\theta$  range of  $5\text{--}90^\circ$ . XPS analysis of the chemical state of materials is carried out on X-ray photoelectron spectrometer (Thermo ESCALAB 250) to obtain the surface element composition and bonding laws of the materials. The binding energy of the sample was calibrated using 284.6 eV as reference line. The field emission scanning electron microscope (FESEM) images were collected by Zeiss EVO25 microscope to observe the morphology of the samples. The chemical structures of

Ti<sub>3</sub>C<sub>2</sub>, ZnFe<sub>2</sub>O<sub>4</sub> and Ti<sub>3</sub>C<sub>2</sub>/ZnFe<sub>2</sub>O<sub>4</sub> series photocatalytic materials have been studied by Fourier transform infrared spectroscopy (FTIR). UV–vis diffuse reflectance spectra (DRS) were recorded at room temperature with a Shimadzu UV 3600 UV–vis spectrophotometer. Electron spin resonance spectrometer (ESR, Bruker A300) was used to detect oxygen vacancy and free radical generation. Electrochemical experiments were conducted with CHI600E electrochemical workstation (Chenhua Instrument) to characterize photocurrent and obtain electrochemical impedance spectroscopy (EIS). Fluorescence spectrophotometer (FLS980 Edinburgh Instruments) is used to measure the photoluminescence (PL) and time-resolved photoluminescence (TR-PL) emission spectrum. TOC–LCPH (Elementer vario Toc titrator) was used for total organic carbon analysis.

### **Section S6: Analysis of intermediates.**

The degradation intermediates during TCH degradation were analysed using an LC–MS (Agilent–1290II–6460, U.S. Agilent Technologies Inc.) system equipped with an SP–C18 chromatographic column. The mobile phase was 0.5% formic acid (HCOOH) and acetonitrile in a volume ratio of 0.3:0.7 with a flow rate of 0.3 mL·min<sup>-1</sup>. The injection volume was 20.00 μL, and the column temperature was 30 °C.

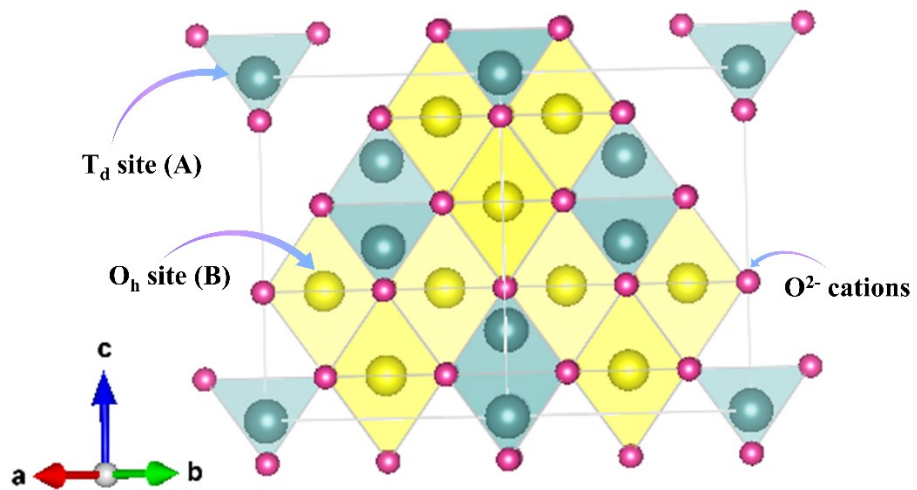

Fig. S1. Crystal structure of spinel crystals. Blue and yellow represent metal cations at T<sub>d</sub> and O<sub>h</sub>, respectively, while oxygen ions are marked in rose red <sup>3</sup>.

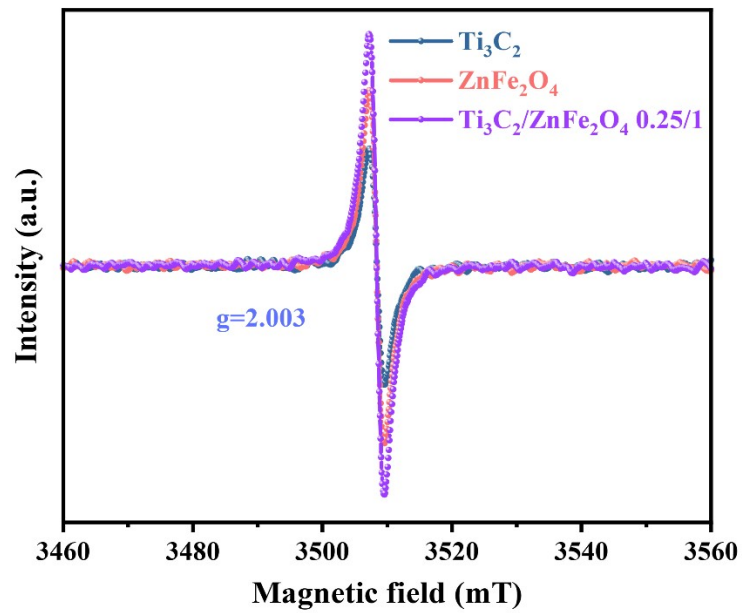

Fig. S2. ESR spectra of  $\text{Ti}_3\text{C}_2$ ,  $\text{ZnFe}_2\text{O}_4$  and the 0.25/1  $\text{Ti}_3\text{C}_2/\text{ZnFe}_2\text{O}_4$  samples.

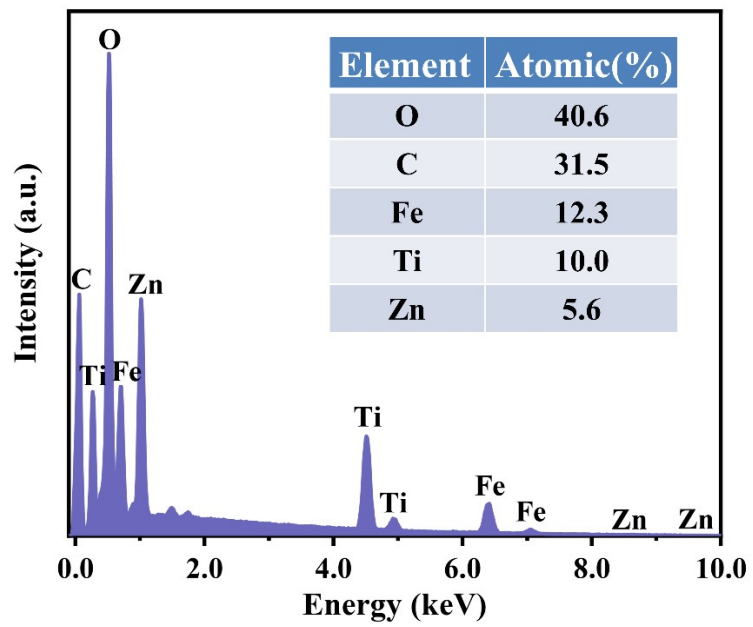

Fig. S3. EDS spectrum of 0.25/1  $\text{Ti}_3\text{C}_2/\text{ZnFe}_2\text{O}_4$ .

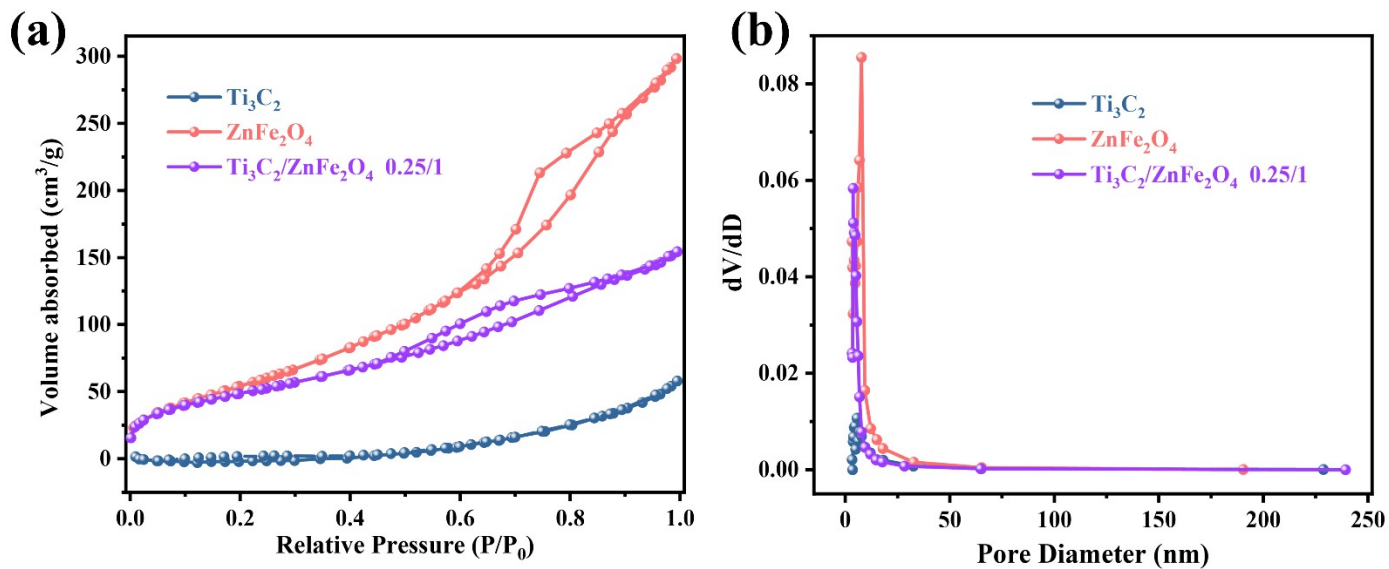

Fig. S4. (a) N<sub>2</sub> adsorption–desorption isotherms and (b) Barrett–Joyner–Halenda (BJH) pore size distribution of Ti<sub>3</sub>C<sub>2</sub>, ZnFe<sub>2</sub>O<sub>4</sub> and the 0.25/1 Ti<sub>3</sub>C<sub>2</sub>/ZnFe<sub>2</sub>O<sub>4</sub> samples.

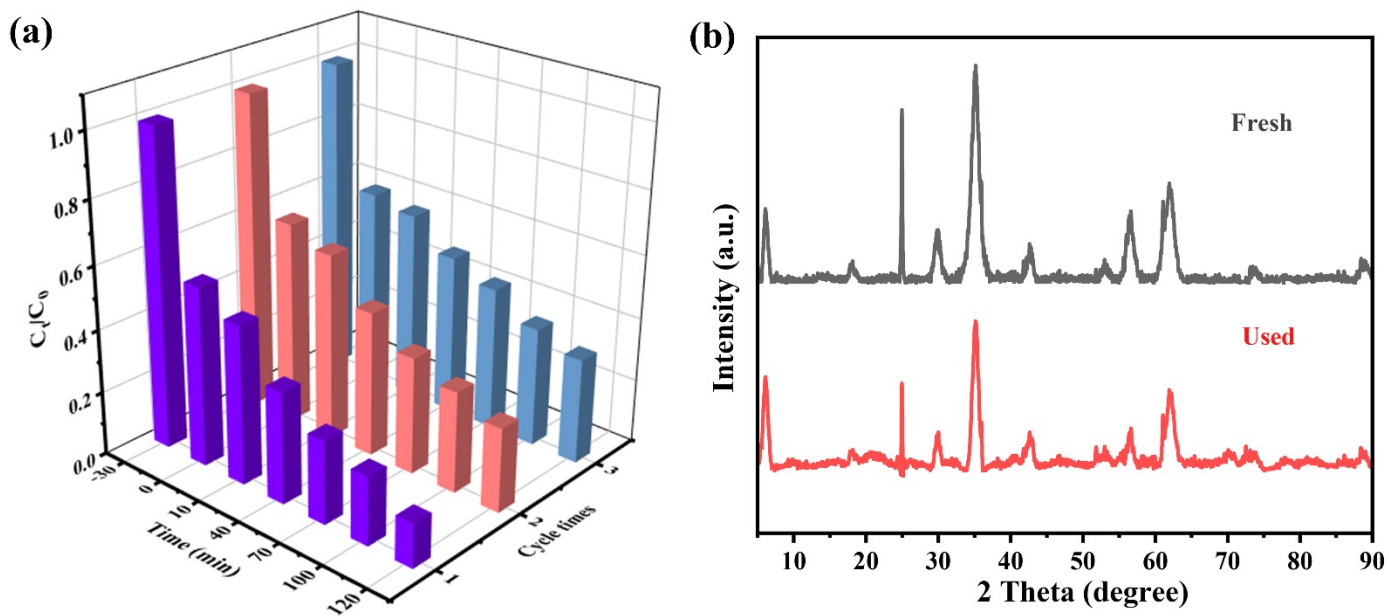

Fig. S5. (a) Cycling runs for photocatalytic TCH degradation in the presence of 0.25/1  $\text{Ti}_3\text{C}_2/\text{ZnFe}_2\text{O}_4$ , and (b) XRD patterns of fresh and recycled 0.25/1  $\text{Ti}_3\text{C}_2/\text{ZnFe}_2\text{O}_4$  catalyst.



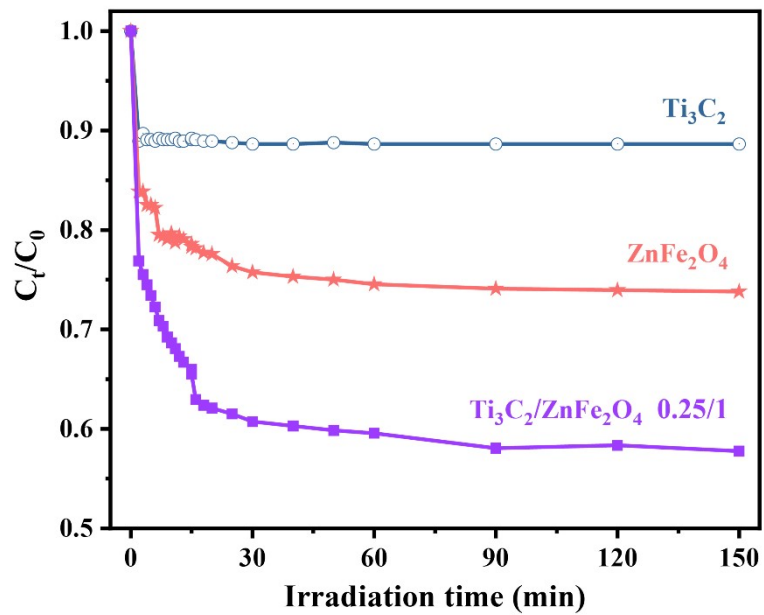

Fig. S6. dark adsorption of TCH on  $Ti_3C_2$ ,  $ZnFe_2O_4$  and 0.25/1  $Ti_3C_2/ZnFe_2O_4$  photocatalytic materials.

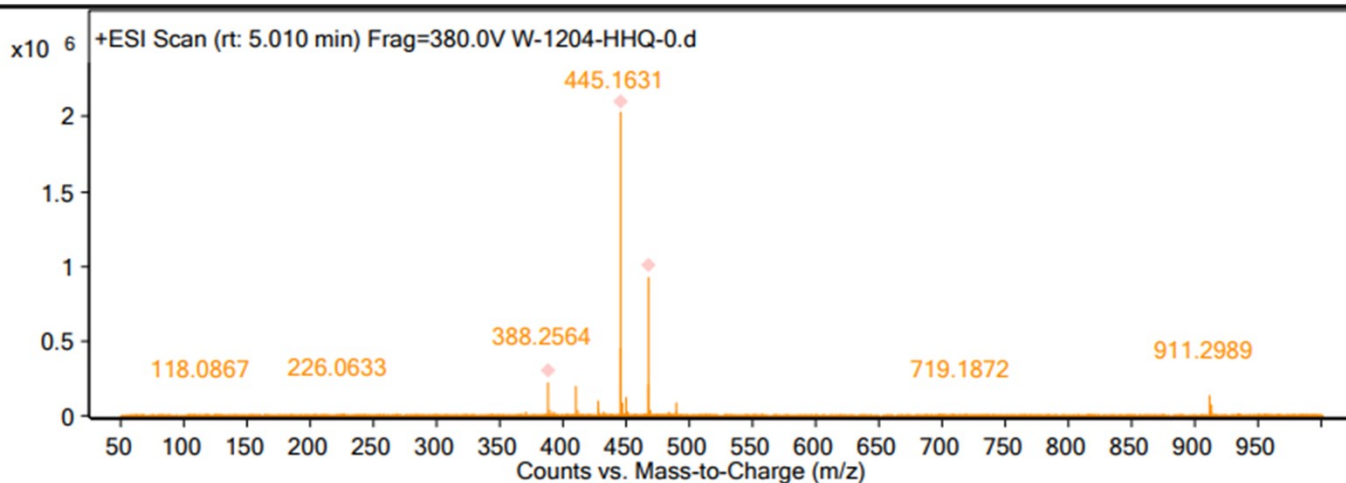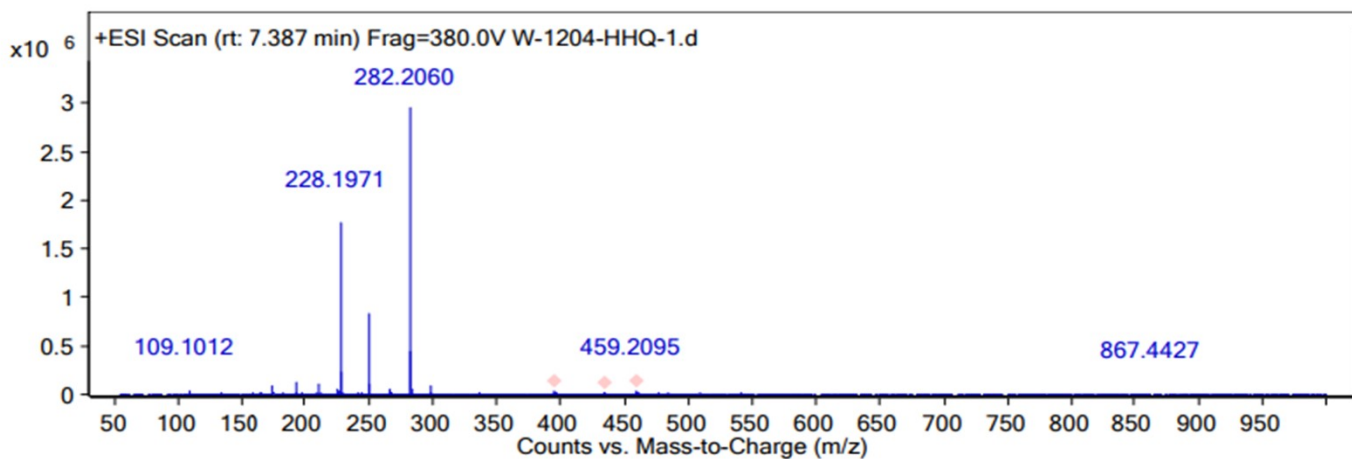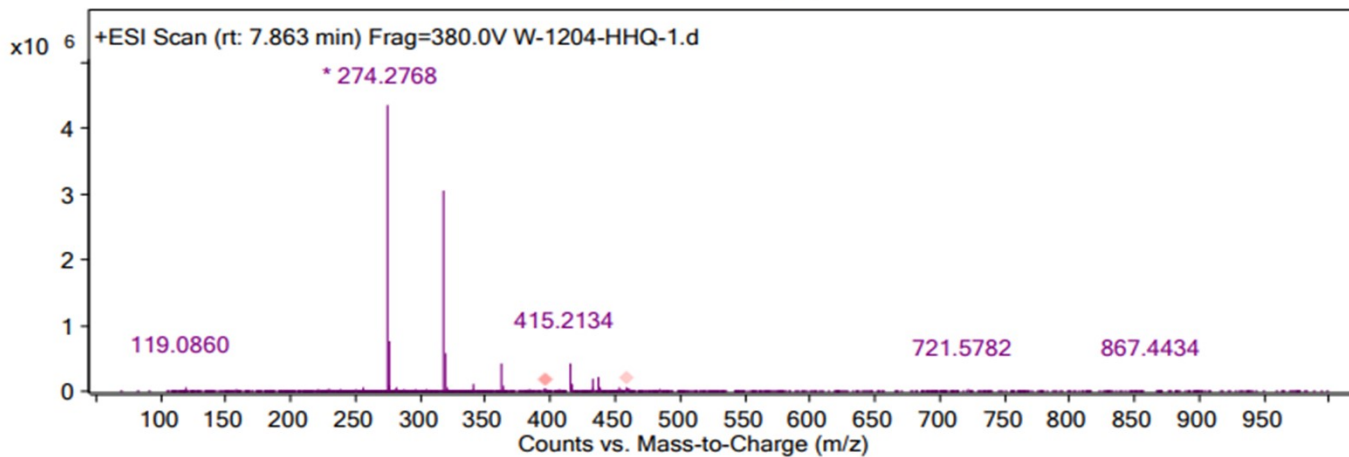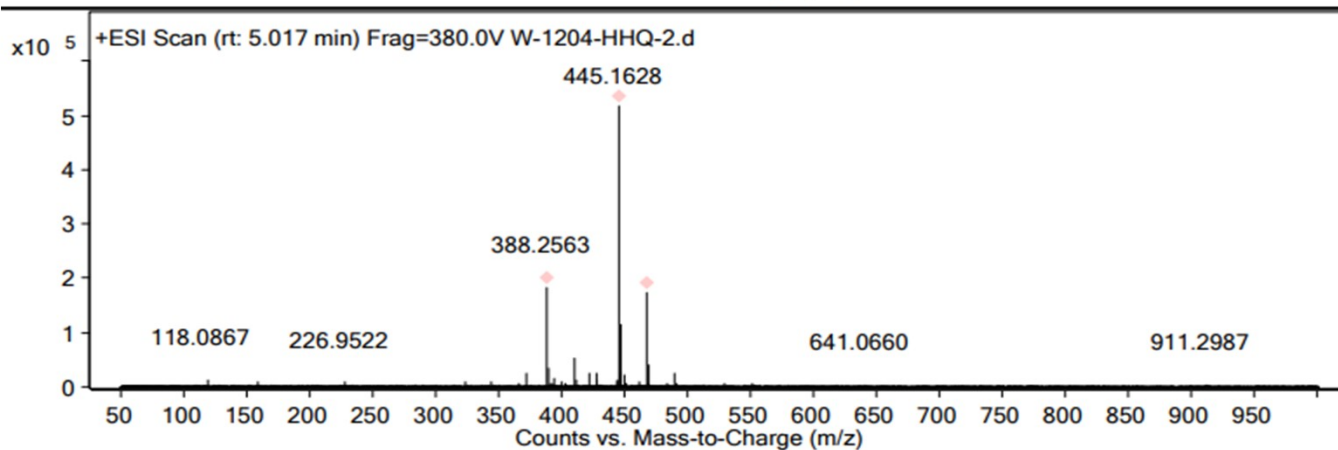

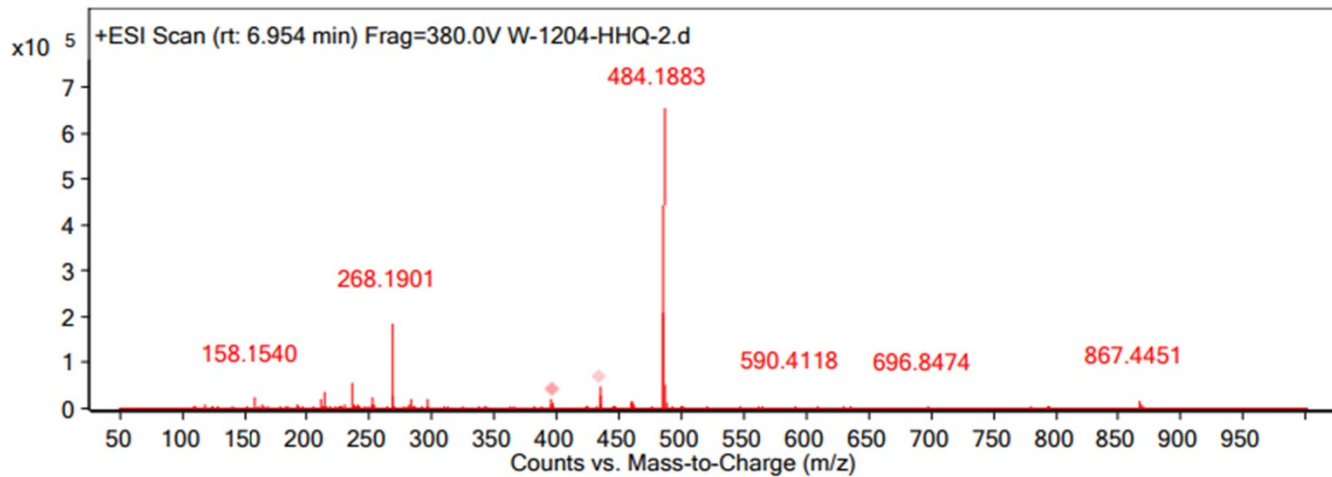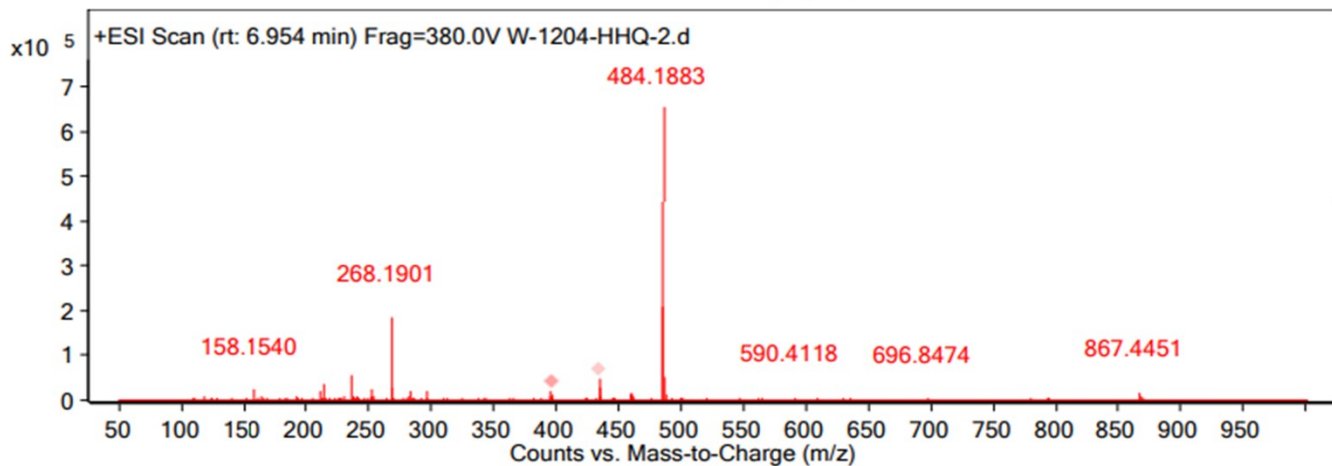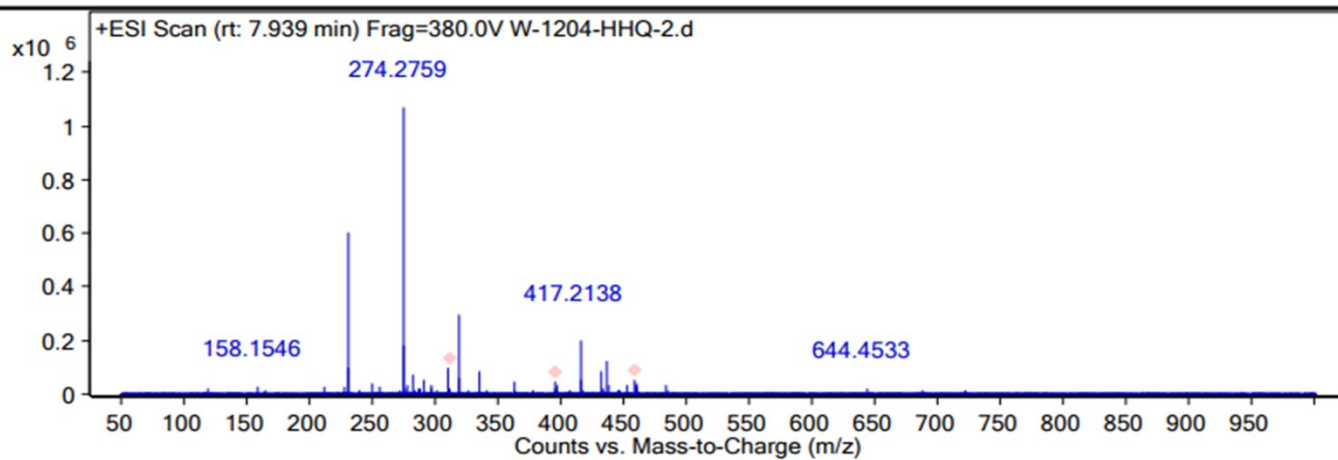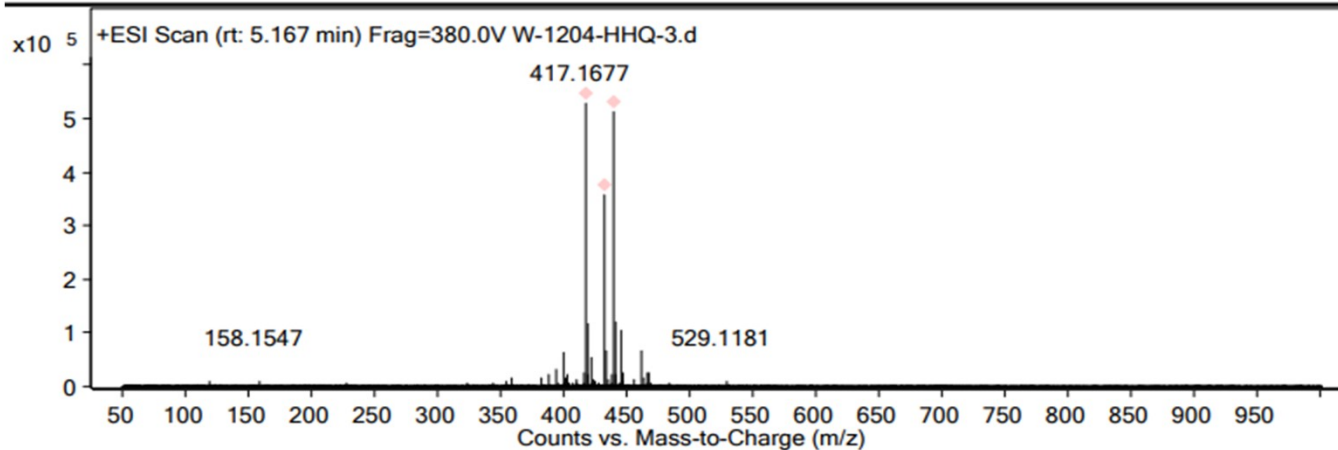

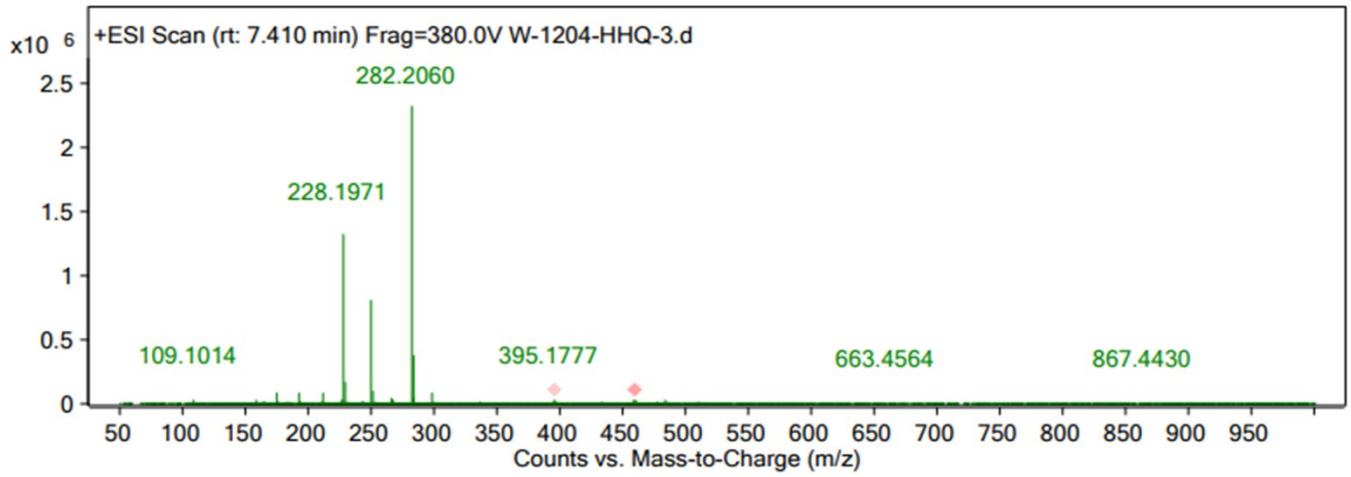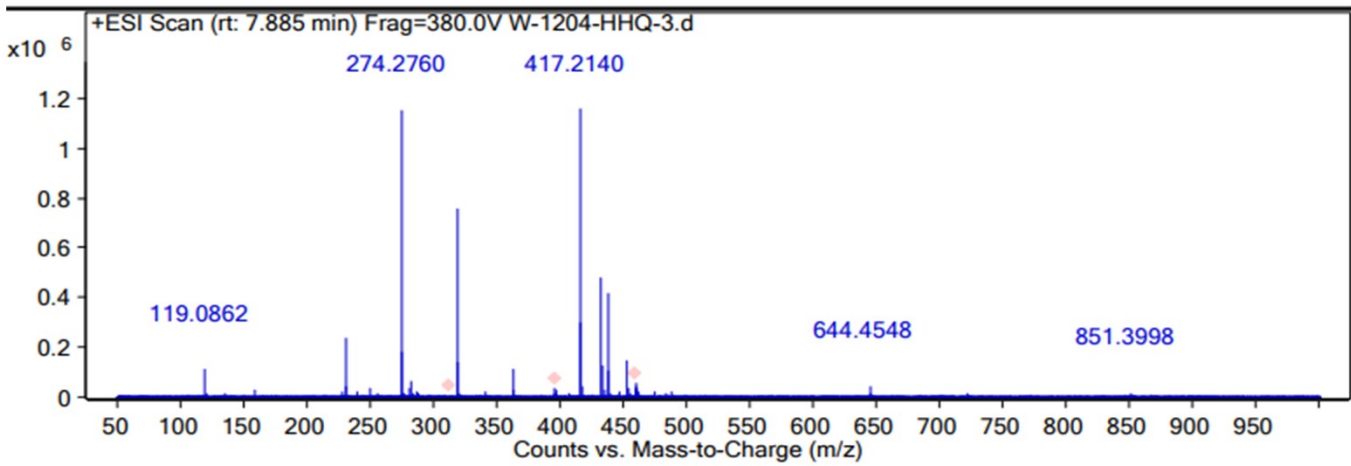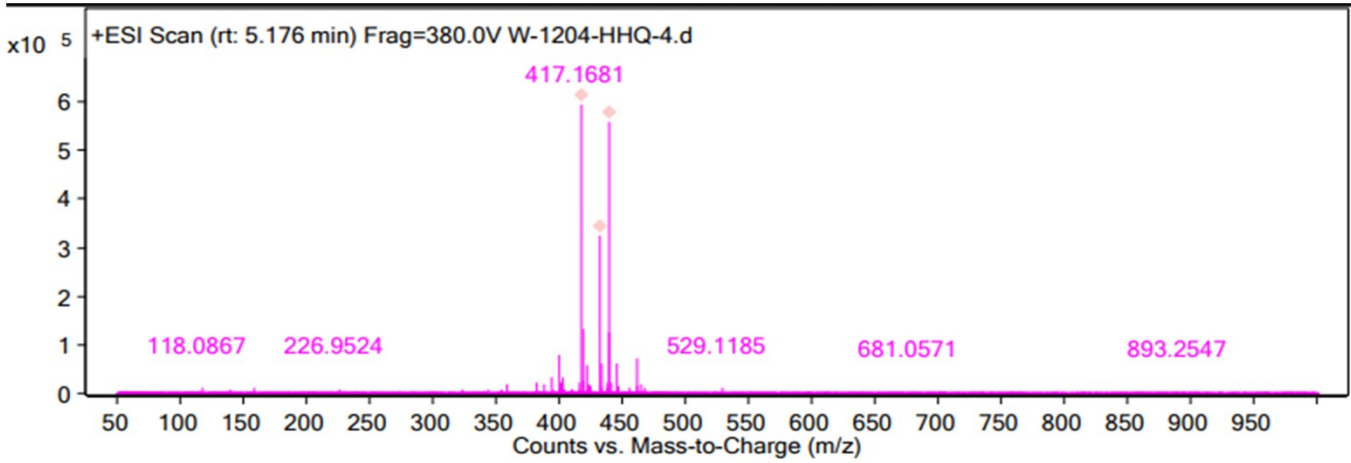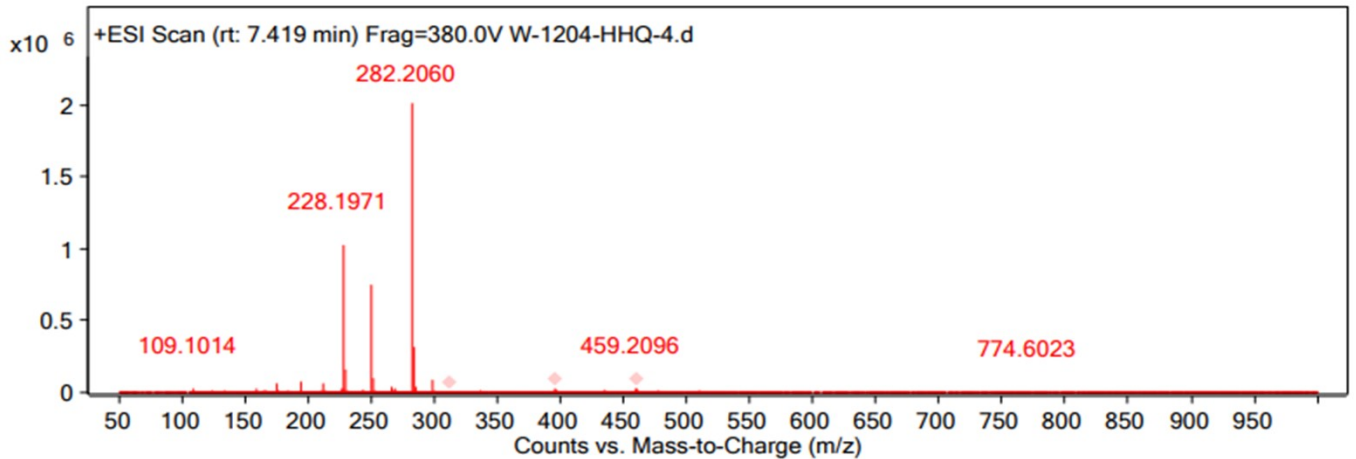

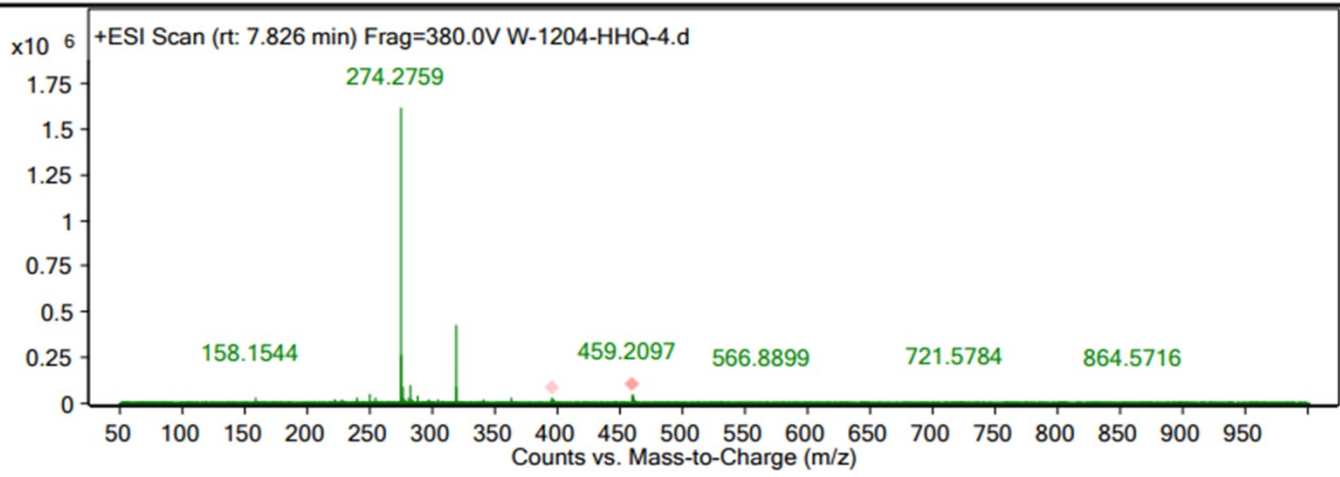

Fig. S7. Mass spectras of degradation intermediates of TCH.

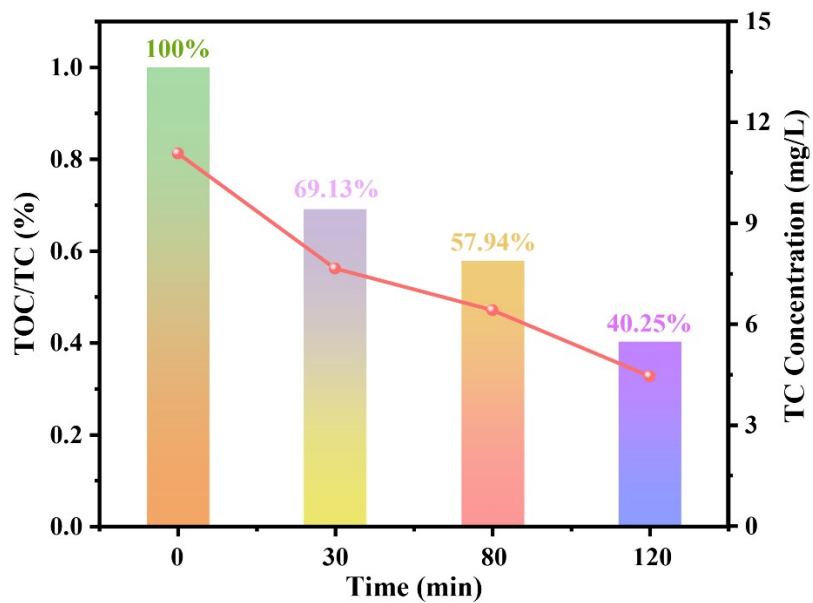

Fig. S8. TOC value of 0.25/1  $\text{Ti}_3\text{C}_2/\text{ZnFe}_2\text{O}_4$  versus TCH at different times.

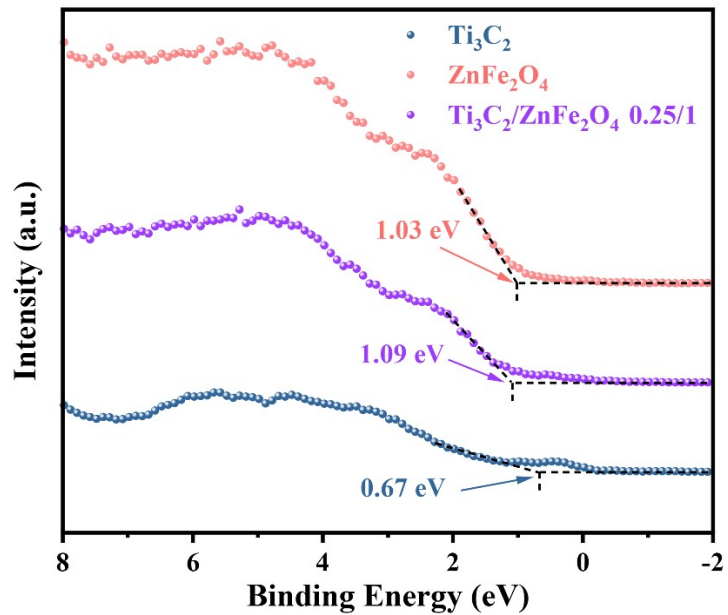

Fig. S9. VB-XPS spectra of  $\text{Ti}_3\text{C}_2$ ,  $\text{ZnFe}_2\text{O}_4$  and the 0.25/1  $\text{Ti}_3\text{C}_2/\text{ZnFe}_2\text{O}_4$  photocatalyst.

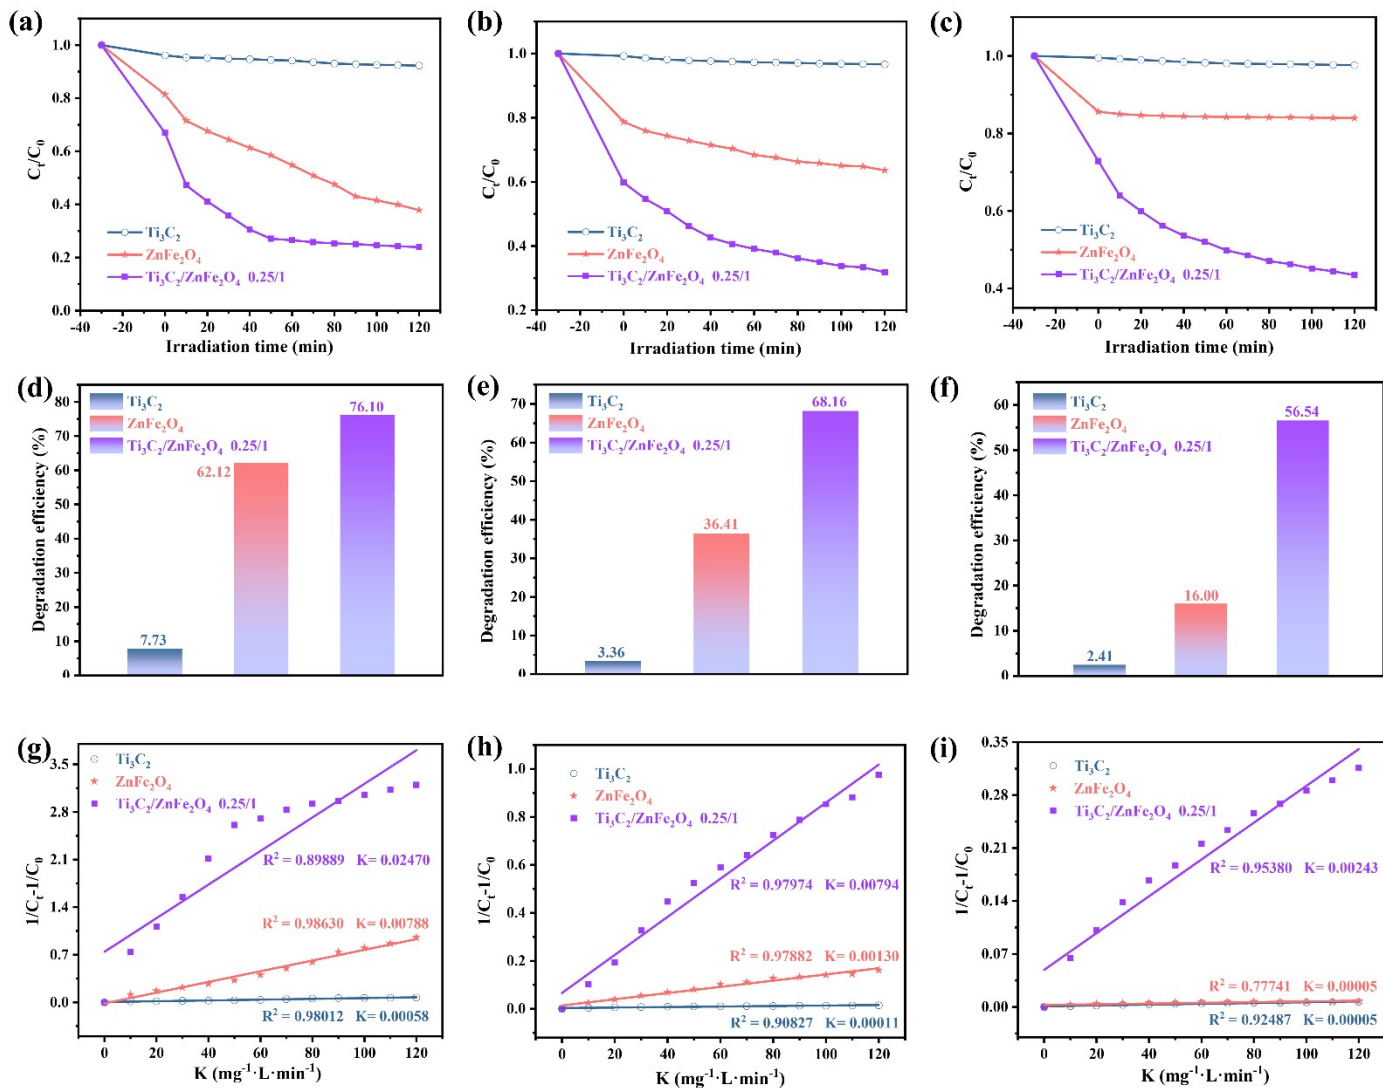

**Fig. S10.** The degradation curves of water pollutants (a) malachite green, (b) xylene orange and (c) chlortetracycline hydrochloride under visible light and their corresponding degradation efficiency histogram (d-f) and fitting curve of pseudo-second-order kinetics; and (g-i) were studied using 0.25/1  $\text{Ti}_3\text{C}_2/\text{ZnFe}_2\text{O}_4$  as photocatalyst.



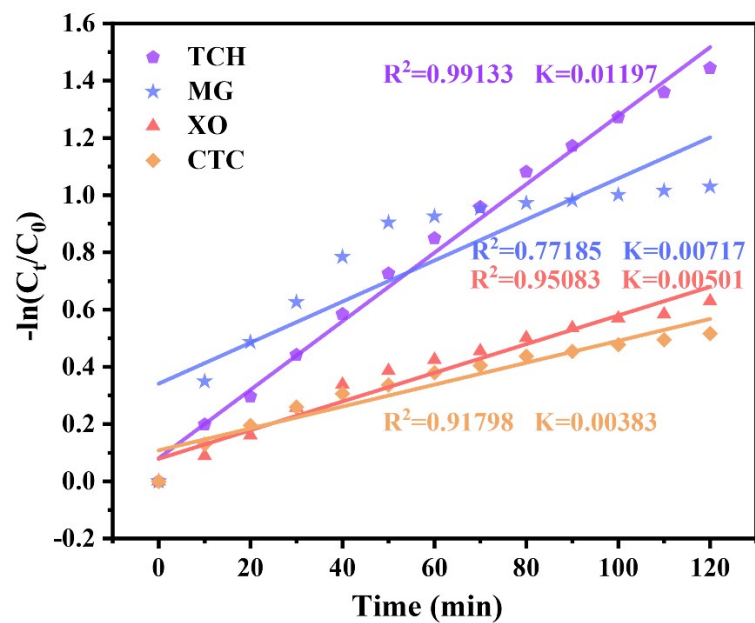

Fig. S11. Fitting curve of pseudo-first-order kinetics.

**Table S1: Specific surface area, pore size and pore volume of as-prepared samples.**

| Samples                                                          | BET Surface Area (m <sup>2</sup> /g) | Pore Volume (cm <sup>3</sup> /g) | Pore Size (nm) |
|------------------------------------------------------------------|--------------------------------------|----------------------------------|----------------|
| Ti <sub>3</sub> C <sub>2</sub>                                   | 40.534                               | 0.107                            | 3.704          |
| ZnFe <sub>2</sub> O <sub>4</sub>                                 | 238.159                              | 0.455                            | 7.726          |
| Ti <sub>3</sub> C <sub>2</sub> /ZnFe <sub>2</sub> O <sub>4</sub> | 130.858                              | 0.202                            | 5.589          |

**Table S2: The double exponential decay fitting data of the samples and the detailed parameters of the decay life.**

| Material                                                                | $\tau_1 (ns)$ | $\tau_2 (ns)$ | $B_1$     | $B_2$    | $\tau_{av} (ns)$ |
|-------------------------------------------------------------------------|---------------|---------------|-----------|----------|------------------|
| Ti <sub>3</sub> C <sub>2</sub>                                          | 15.94386      | 1.242467      | 0.4271554 | 725.6191 | 1.353            |
| ZnFe <sub>2</sub> O <sub>4</sub>                                        | 15.74716      | 1.239377      | 0.9200619 | 795.202  | 1.450            |
| 0.25/1 Ti <sub>3</sub> C <sub>2</sub> /ZnFe <sub>2</sub> O <sub>4</sub> | 16.01142      | 1.315384      | 2.05093   | 873.8648 | 1.724            |

$$C(t) = \sum_{i=1,2} B_i \exp(-t / \tau_i)$$

$$\tau_{av} = \frac{\sum_{i=1}^2 B_i \tau_i^2}{\sum_{i=1}^2 B_i \tau_i}$$

**Table S3: Different catalysts in visible decline rate of the degradation of TCH, kinetic constants and correlation coefficient.**

| Catalysts                                                               | Degradation efficiency (%) | Kinetic equation                        | Kinetic constant K (min <sup>-1</sup> ) | Correlation coefficient |
|-------------------------------------------------------------------------|----------------------------|-----------------------------------------|-----------------------------------------|-------------------------|
| None                                                                    | 0.644                      | $y = 2.48885 \times 10^{-5}x + 0.00249$ | 0.000025                                | 0.41844                 |
| Ti <sub>3</sub> C <sub>2</sub>                                          | 7.729                      | $y = 3.40763 \times 10^{-4}x + 0.00258$ | 0.00034                                 | 0.98219                 |
| ZnFe <sub>2</sub> O <sub>4</sub>                                        | 62.662                     | $y = 0.00579x + 0.02533$                | 0.00579                                 | 0.99432                 |
| 1.5/1 Ti <sub>3</sub> C <sub>2</sub> /ZnFe <sub>2</sub> O <sub>4</sub>  | 55.501                     | $y = 0.00414x + 0.04215$                | 0.00414                                 | 0.97003                 |
| 1/1 Ti <sub>3</sub> C <sub>2</sub> /ZnFe <sub>2</sub> O <sub>4</sub>    | 64.161                     | $y = 0.00481x + 0.03567$                | 0.00481                                 | 0.98235                 |
| 0.5/1 Ti <sub>3</sub> C <sub>2</sub> /ZnFe <sub>2</sub> O <sub>4</sub>  | 82.248                     | $y = 0.01028x + 0.09495$                | 0.01028                                 | 0.98693                 |
| 0.25/1 Ti <sub>3</sub> C <sub>2</sub> /ZnFe <sub>2</sub> O <sub>4</sub> | 87.097                     | $y = 0.01197x + 0.08034$                | 0.01197                                 | 0.99055                 |
| 0.2/1 Ti <sub>3</sub> C <sub>2</sub> /ZnFe <sub>2</sub> O <sub>4</sub>  | 70.505                     | $y = 0.00678x + 0.08696$                | 0.00678                                 | 0.97791                 |

**Table S4: Comparison of reports on photocatalytic degradation of pollutants.**

| Photocatalyst                                                                                 | Pollutant /Conc. mg·L <sup>-1</sup> | V(aq)/ mL | Dose/ mg | Visible light source | Response time/min | Degradation/ %            | Ref       |
|-----------------------------------------------------------------------------------------------|-------------------------------------|-----------|----------|----------------------|-------------------|---------------------------|-----------|
| ZnFe <sub>2</sub> O <sub>4</sub> /CuWO <sub>4</sub>                                           | TC/40                               | 50        | 40       | 300 W Xe lamp        | 150               | 86                        | 4         |
| CuBi <sub>2</sub> O <sub>4</sub> /ZnFe <sub>2</sub> O <sub>4</sub>                            | TC/20                               | 100       | 100      | 300 W Xe lamp        | 120               | 80.16                     | 5         |
| ZnFe <sub>2</sub> O <sub>4</sub> /Sepiolite                                                   | TC/20                               | 100       | 100      | 300 W Xe lamp        | 180               | 93.6                      | 6         |
| CdS/ZnFe <sub>2</sub> O <sub>4</sub>                                                          | MB/5; RhB/30; MO/20                 | 20        | 20       | 500 W Xe lamp        | 50                | 78; 95; 72                | 7         |
| ZnFe <sub>2</sub> O <sub>4</sub> /ZnO                                                         | MB/20; MO/20                        | 100       | 50       | 500 W halogen lamp   | 300               | 91; 99                    | 8         |
| Ag/ZnFe <sub>2</sub> O <sub>4</sub> /Ag/<br>BiTa <sub>1-x</sub> V <sub>x</sub> O <sub>4</sub> | SAM/10                              | 25        | 25       | 500 W Xe lamp        | 360               | 100                       | 9         |
| ZnFe <sub>2</sub> O <sub>4</sub> /C/MnO <sub>2</sub> /<br>BiOI                                | MO/10; RhB/10                       | 65        | 25       | 300 W Xe lamp        | 120               | 90; 94                    | 10        |
| ZnFe <sub>2</sub> O <sub>4</sub> /BiVO <sub>4</sub> /<br>g-C <sub>3</sub> N <sub>4</sub>      | LFX/25                              | 300       | 150      | 300 W Xe lamp        | 105               | 82                        | 11        |
| ZnIn <sub>2</sub> S <sub>4</sub> /ZnFe <sub>2</sub> O <sub>4</sub>                            | RhB/20; Cr(VI)/10                   | 50        | 10; 15   | 300 W Xe lamp        | 8; 20             | 99.6; 96.6                | 12        |
| ZnFe <sub>2</sub> O <sub>4</sub> /<br>Na-bentonite                                            | RhB/10; Cr(VI)/50                   | 100       | 100      | 350 W Xe lamp        | 120               | 88.6; 94.2                | 13        |
| Fe-C <sub>3</sub> N <sub>4</sub> / Ti <sub>3</sub> C <sub>2</sub>                             | TC/20                               | 50        | 20       | 280 W Xe lamp        | 180               | 86.8                      | 14        |
| BiOBr/Bi <sub>2</sub> MoO <sub>6</sub> /<br>Ti <sub>3</sub> C <sub>2</sub> /MMTex             | LEV/5                               | 50        | 20       | 500 W Xe lamp        | 120               | 99                        | 15        |
| ZnO/Ti <sub>3</sub> C <sub>2</sub>                                                            | MO/10                               | 300       | 300      | 300 W Xe lamp        | 60                | 86.8                      | 16        |
| Ti <sub>3</sub> C <sub>2</sub> MXene/<br>CaIn <sub>2</sub> S <sub>4</sub>                     | Cr(VI)/40                           | 100       | 20       | 300 W Xe lamp        | 120               | 98.94                     | 17        |
| Ti <sub>3</sub> C <sub>2</sub> MXene/<br>SnS <sub>2</sub>                                     | Cr(VI)/50                           | 50        | 25       | Xe lamp              | 60                | 90.2                      | 18        |
| Bi <sub>3</sub> O <sub>4</sub> Br/Ti <sub>3</sub> C <sub>2</sub>                              | BPA/10                              | 100       | 50       | 300 W Xe lamp        | 60                | 91.26                     | 19        |
| Cs <sub>2</sub> AgBiBr <sub>6</sub> /<br>Ti <sub>3</sub> C <sub>2</sub> Tx                    | RhB/30                              | 30        | 20       | 300 W Xe lamp        | 70                | 100                       | 20        |
| Ti <sub>3</sub> C <sub>2</sub> /ZnFe <sub>2</sub> O <sub>4</sub>                              | TCH/20; MG/20;<br>XO/20; CTC/20     | 100       | 20       | 300 W Xe lamp        | 120               | 87.1; 76.1;<br>68.2; 56.5 | This work |

TC/TCH: Tetracycline; MB: Methylene blue; RhB: Rhodamine B; MO: Methyl orange; SAM: Sulfonamide;

LFX: Lomefloxacin; Cr(VI): Hexavalent Chromium; LEV: Levofloxacin; BPA: Bisphenol A; MG:

Malachite green; XO: Xylenol orange; CTC: Chlortetracycline

**Table S5: The possible intermediates products of TCH degradation.**

| Serial number | Formula                 | m/z    | Potential structure                                                                   |
|---------------|-------------------------|--------|---------------------------------------------------------------------------------------|
| P1            | $C_{20}H_{20}N_2O_{10}$ | 417.16 | 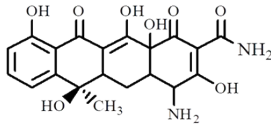   |
| P4            | $C_{20}H_{20}N_2O_9$    | 433.28 |    |
| P8            | $C_{13}H_{12}O_7$       | 282.20 |    |
| P9            | $C_{10}H_4O_9$          | 268.19 |    |
| P10           | $C_3H_4O_5$             | 119.08 |    |
| P2            | $C_{22}H_{24}N_2O_9$    | 461.15 |   |
| P5            | $C_{20}H_{17}NO_{10}$   | 432.24 |  |
| P6            | $C_{17}H_{16}O_6$       | 318.30 |  |
| P7            | $C_{20}H_{25}NO_{10}$   | 439.15 |  |
| P11           | $C_{15}H_{14}O_5$       | 274.27 |  |
| P3            | $C_{19}H_{17}NO_8$      | 388.25 |  |
| P12           | $C_{11}H_{19}NO_4$      | 230.25 |  |

## Equation S1:

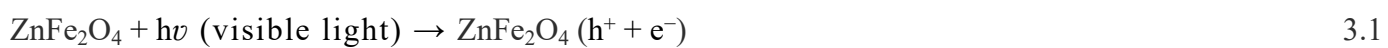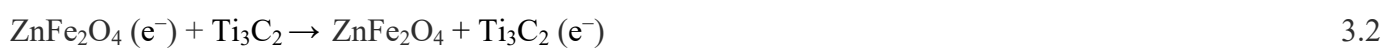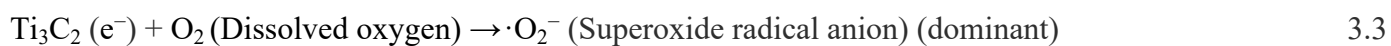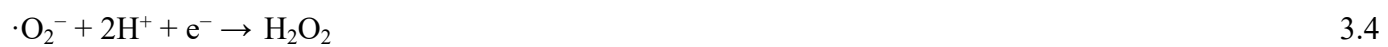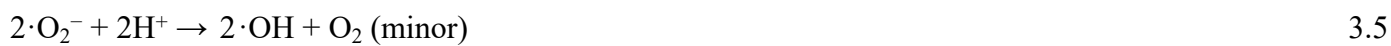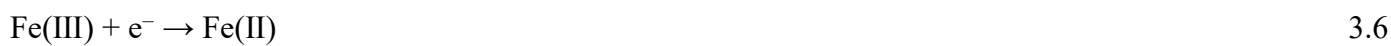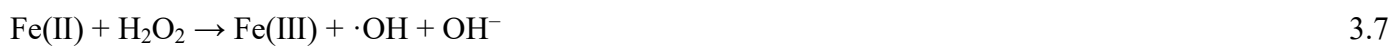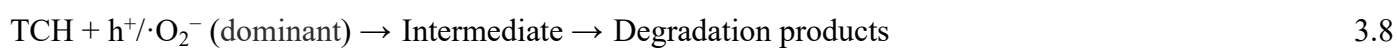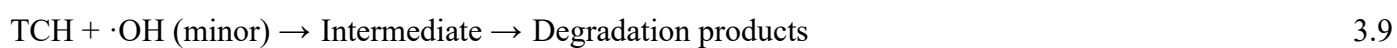

## References:

1. B. Tan, Y. Fang, Q. Chen, X. Ao and Y. Cao, *J. Colloid Interface Sci.*, 2021, **601**, 581–593.
2. P. Yuhui, D. Lianwen, Z. Pin, G. Xiaohui, H. Shengxiang, F. Shuguang, Q. Ting and L. Chen, *J. Magn. Magn. Mater.*, 2021, **541**, 168544.
3. J. R. Sandemann, T. B. E. Grønbech, K. A. H. Støckler, F. Ye, B. C. Chakoumakos and B. B. Iversen, *Adv. Mater.*, 2022, **35**, 2207152.
4. J. Luo, Y. Wu, X. Chen, T. He, Y. Zeng, G. Wang, Y. Wang, Y. Zhao and Z. Chen, *J. Alloys Compd.*, 2022, **884**, 161292.
5. K. Song, C. Zhang, Y. Zhang, G. Yu, M. Zhang, Y. Zhang, L. Qiao, M. Liu, N. Yin, Y. Zhao and Y. Tao, *J. Photochem. Photobiol. A Chem.*, 2022, **433**, 114122.
6. C. Zhang, X. Han, F. Wang, L. Wang and J. Liang, *Front. Chem.*, 2021, **9**, 736369.
7. L. Zou, H. Wang, X. Jiang, G. Yuan and X. Wang, *Solar Energy*, 2020, **195**, 271–277.
8. R. Rameshbabu, N. Kumar, A. Karthigeeyan and B. Neppolian, *Materials Chemistry and Physics*, 2016, **181**, 106–115.
9. R. Wang, J. Tang, X. Zhang, D. Wang, X. Wang, S. Xue, Z. Zhang and D. D. Dionysiou, *J. Hazard. Mater.*, 2019, **375**, 161–173.
10. M. Ma, Y. Chen, J. Jiang, Y. Bi, Z. Liao and Y. Ma, *Environ. Sci. Pollut. Res.*, 2022, **29**, 63233–63247.
11. H. B. Truong, B. T. Huy, S. K. Ray, G. Gyawali, Y.-I. Lee, J. Cho and J. Hur, *Chemosphere*, 2022, **299**, 134320.
12. Q. Gao, Z. Wang, J. Li, B. Liu and C. Liu, *Environ. Sci. Pollut. Res.*, 2022, **30**, 16438–16448.
13. Y. Guo, Y. Guo, D. Tang, Y. Liu, X. Wang, P. Li and G. Wang, *J. Alloys Compd.*, 2019, **781**, 1101–1109.
14. Z. Huo, Y. Liao, Y. He, Y. Zhang, X. Liao, Q. Zhang, H. Wu, J. Shi, G. Wen, H. Su and S. Yao, *Front. Chem.*, 2022, **10**, 865847.
15. L. Kun, W. Linxing, F. Tian, Z. Hanbing, L. Caimei, T. Zhangfa, Y. Yang and P. Yuan, *J. Chem. Eng. Data*, 2023, **457**, 141271.
16. Z. Bin, N. Xutao and L. Linfang, *J. Alloys Compd.*, 2023, **963**, 171309.
17. L. Chao, X. Wen, L. Xingyu, W. Qiang, H. Jiawei, Z. Siyuan, X. Jianguang, Z. Qinfang and Z. Zhigang, *Journal of Materials Science & Technology*, 2023, **161**, 123–135.
18. T. Yunmeng, W. Chengquan, Z. Qi, C. Haining, L. Yue, W. Kun, W. Jie, L. Lingliang and Q. Jing, *Sens. Actuators B Chem.*, 2023, **382**, 133496.
19. Z. Huiqi, M. Xiaorong, Y. Yingzi, C. Jin and H. Shanshan, *J. Environ. Chem. Eng.*, 2023, **11**, 110064.



20. C. Shanshan, C. Xu, W. Meng, L. Gaoqiang, Q. Xiaofeng, T. Yongtao, J. Mochen, H. Yanbing, W. Di, L. Xinjian and S. Zhifeng, *Appl. Surf. Sci.*, 2023, **621**, 156877.
